# Supplementary material for: Solvent-free electrospinning of UV curable polymer microfibers
Source: Royal Society of Chemistry journal article supplement (doi:10.1039/c6ra04566a), 2016-01-01
Supplement: c6ra04566a1.pdf [file c6ra04566a1.pdf]

## Supplementary Information

### Solvent-free electrospinning of UV curable polymer microfibers

Hong-Wei He,<sup>†a,b</sup> Le Wang,<sup>†a</sup> Xu Yan,<sup>†a</sup> Li-Hua Zhang,<sup>a</sup> Miao Yu,<sup>a,c</sup> Gui-Feng Yu,<sup>a,b</sup>  
Rui-Hua Dong,<sup>a</sup> Lin-Hua Xia,<sup>\*a</sup> Seeram Ramakrishna,<sup>\*d</sup> and Yun-Ze. Long<sup>\*a,e</sup>

<sup>a</sup> *Collaborative Innovation Center for Nanomaterials & Optoelectronic Devices, College of  
Physics, Qingdao University, Qingdao 266071, China*

<sup>b</sup> *College of Chemical Science & Engineering, Qingdao University, Qingdao 266071, China*

<sup>c</sup> *Department of Mechanical Engineering, Columbia University, New York, NY 10027, USA*

<sup>d</sup> *Center for Nanofibers & Nanotechnology, Nanoscience & Nanotechnology Initiative, Faculty of  
Engineering, National University of Singapore, Singapore*

<sup>e</sup> *Collaborative Innovation Center for Marine Biomass Fibers, Materials & Textiles of Shandong  
Province, Qingdao University, Qingdao 266071, China*

\*Corresponding author

[yunze.long@163.com](mailto:yunze.long@163.com) or [yunze.long@qdu.edu.cn](mailto:yunze.long@qdu.edu.cn) (Y. Z. Long),

[LHX@qdu.edu.cn](mailto:LHX@qdu.edu.cn) (L. H. Xia)

[seeram@nus.edu.sg](mailto:seeram@nus.edu.sg) (S. Ramakrishna)

<sup>†</sup>Equal contributors.

Followings are the different kinds of materials fabricated by UV curable solvent-free e-spinning method.

**S1.** Color DR-U301 (PUA) fibers were fabricated by this solvent-free e-spinning method by adding different dyes into the precursor solutions.

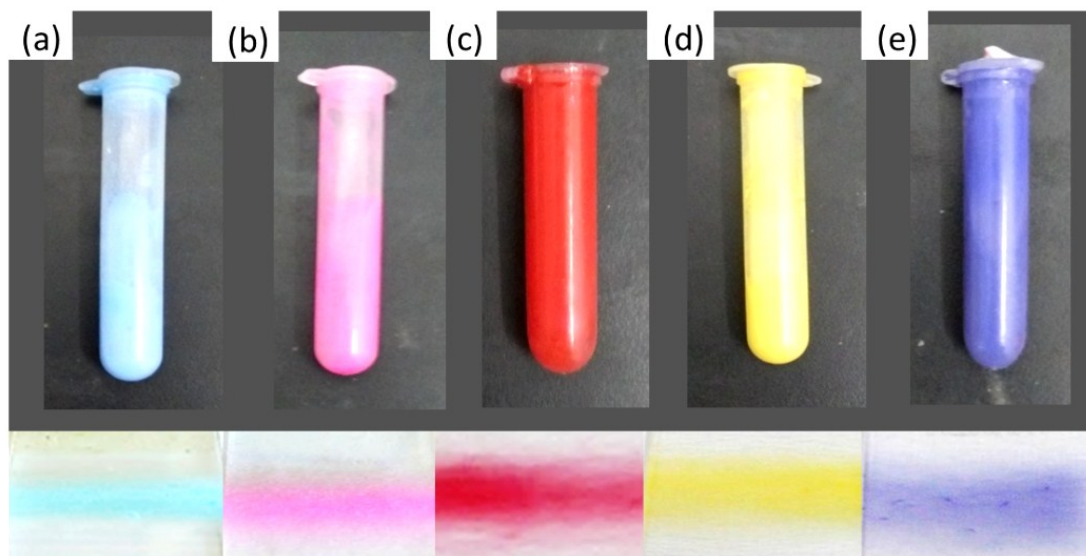

**Fig. S1** Digital images of the colorful ultrathin DR-U301 fibers electrospun from the colorful precursor solutions: (a) blue, (b) pink, (c) red, (d) yellow, and (e) purple, respectively. The applied spinning voltage was 30 kV and the rotating speed of collector drum was 280 rpm.

**S2.** Electrical conductive DR-U301 fibers were fabricated by this solvent-free e-spinning method by adding conducting polyaniline into the precursor solution.

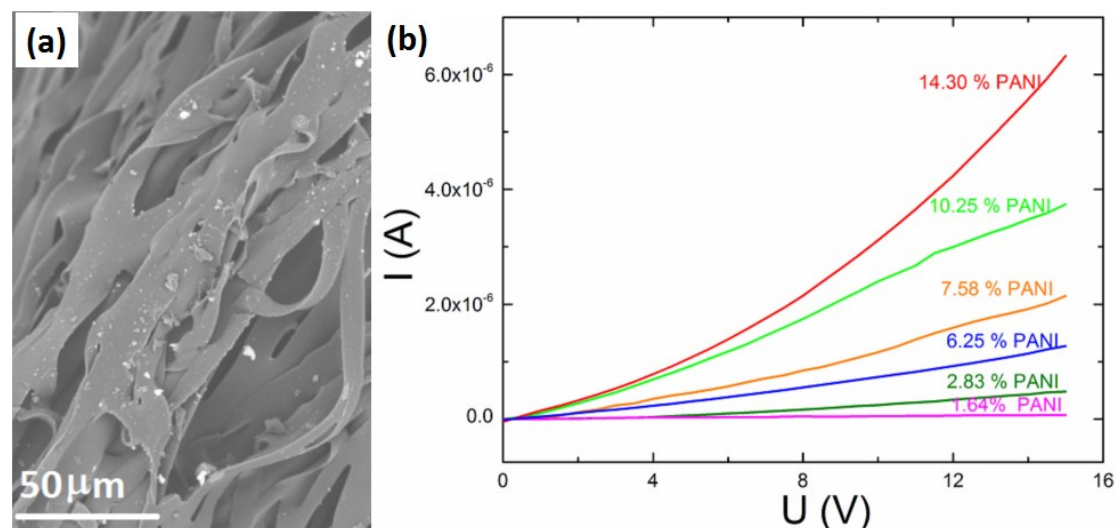

**Fig. S2** (a) SEM image of the electrical conductive DR-U301 fibers (belts) electrospun from the precursor solution doped with conducting polyaniline (PANI). The applied spinning voltage was 30 kV and the rotating speed of collector drum was 280 rpm. (b) Current-voltage (I-V) curves of the composite DR-U301 fibers with different PANI concentrations of 1.64, 2.83, 6.25, 7.58, 10.25, and 14.30 wt%, measured at room temperature.

S3. Magnetic DR-U301 fibers were fabricated by this solvent-free e-spinning method by adding magnetic  $\text{Fe}_2\text{O}_3$  nanoparticles into the precursor solution.

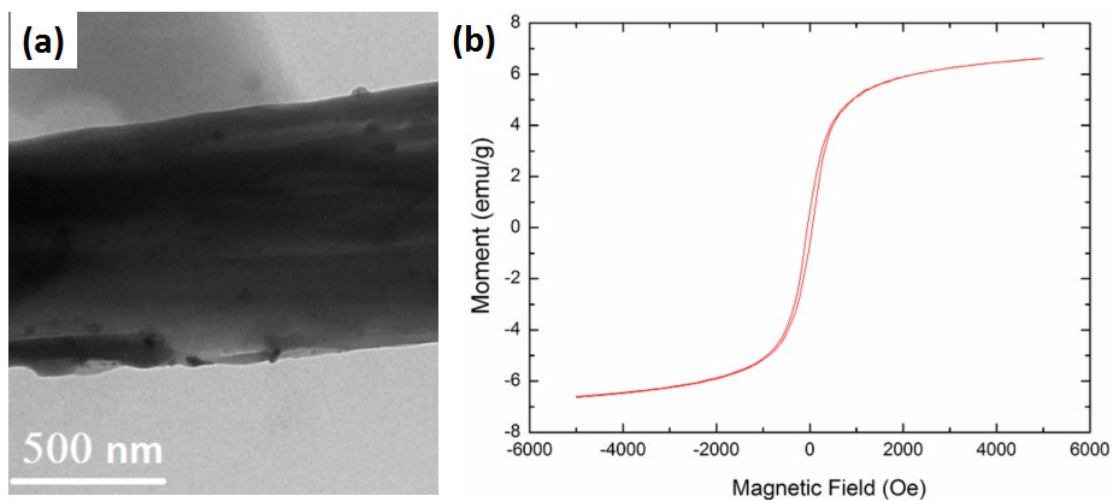

**Fig. S3** (a) TEM image of the magnetic DR-U301 fibers electrospun from the precursor solution doped with  $\text{Fe}_2\text{O}_3$  nanoparticles. The applied spinning voltage was 30 kV and the rotating speed of collector drum was 280 rpm. (b) Magnetization versus applied magnetic field plot at room temperature for the magnetic composite fibers.
